# Supplementary material for: Genetic Relationships in the Toxin-Producing Fungal Endophyte, Alternaria oxytropis Using Polyketide Synthase and Non-Ribosomal Peptide Synthase Genes
Source: MDPI journal article supplement (doi:10.3390/jof7070538), 2021-07-06
Supplement: s1 [file s1]

## Supplemental Figures

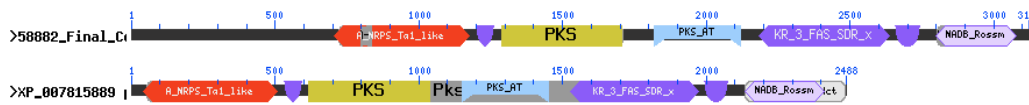

**Figure S1.** Domain order of PKS-NRPS5882 and polyketide synthase of *Metarhizium acridum* XP\_07815889. A=adenylation, PKS = ketoacyl synthase, AT= acyl transferase, KR = ketoreductase, NADB Rossm = NAD binding Rossman folding.

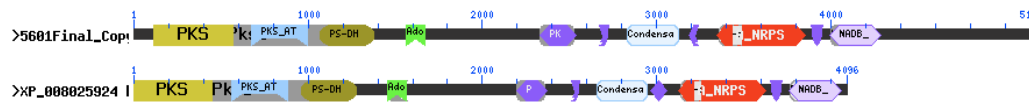

**Figure S2.** Domain order of PKS-NRPS5601 and hypothetical protein of *Setosphaeria turcica* XP\_008025924. PKS = ketoacyl synthase, AT= acyl transferase, DH = dehydratase, Ado = methyltransferase, Condensa = condensation, A = adenylation, NADB = NAD binding.

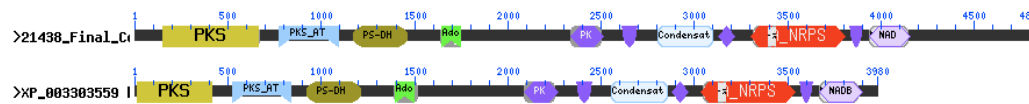

**Figure S3.** Domain order of PKS-NRPS21438 and hypothetical protein of *Pyrenophora teres* XP\_003303559.

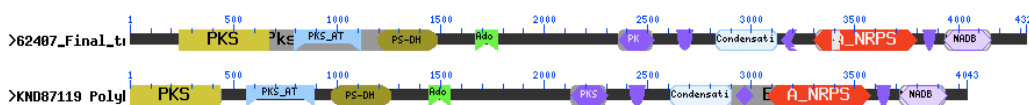

**Figure S4.** Domain order of PKS-NRPS62407 and hypothetical protein of *Tolypocladium ophioglossoides* KND87119.

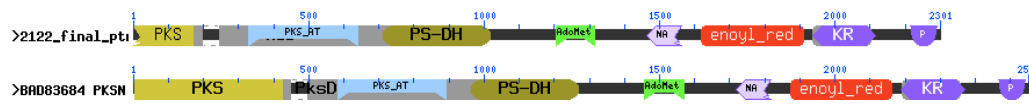

**Figure S5.** Domain order of PKS2122 and ALT5 of *Alternaria solani* BAD83684. PKS = ketoacyl synthase, AT= acyl transferase, DH = dehydratase, AdoMet = methyltransferase, NA = neuraminidase, enoyl red = enoyl reductase, KR = ketoreductase, P = acyl carrier protein.

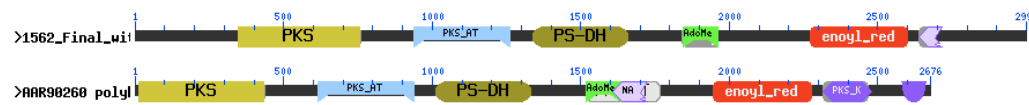

**Figure S6.** Domain order of PKS1562 and PKS5 of *Bipolaris maydis* AAR90268.

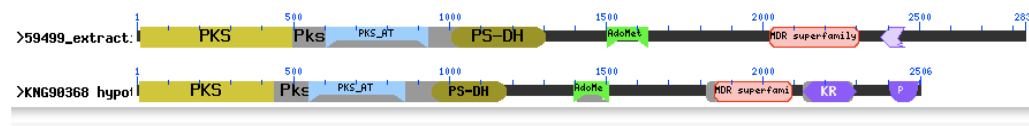

**Figure S7.** Domain order of PKS59499 and hypothetical protein of *Aspergillus nomius* KNG90368. PKS = ketoacyl synthase, AT= acyl transferase, DH = dehydratase, AdoMet = methyltransferase, MDR superfamily = medium chain dehydrogenases/reductases, KR = ketoreductase, P = acyl carrier protein?

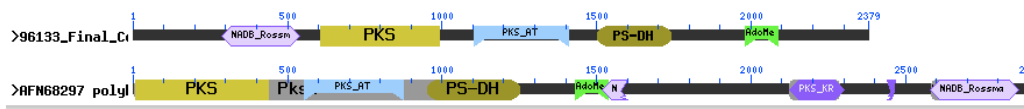

**Figure S8.** Domain order of PKS96133 and PKSF of *Alternaria alternata* AFN68297. NADB Rossm = NAD binding Rossman folding.

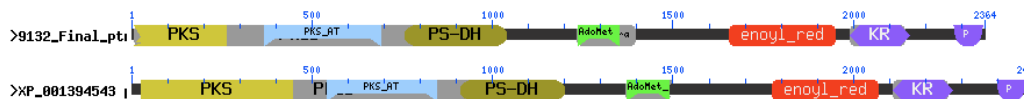

**Figure S9.** Domain order of PKS9132 and PKSD of *Aspergillus niger* XP\_001394543. enoyl red = enoyl reductase, KR = ketoreductase, P = acyl carrier protein.

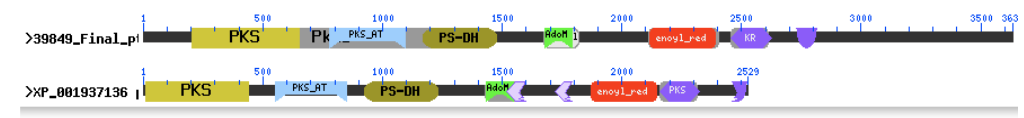

**Figure S10.** Domain order of PKS39849 and PPSA of *Pyrenophora tritici-repentis* XP\_001937136. PKS = keTable 11. Domain order of PKS17612 and PPSB of *Pyrenophora tritici-repentis* XP\_001934720.

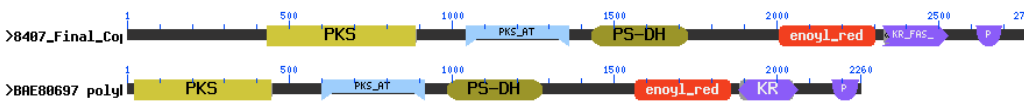

**Figure S11.** Domain order of PKS8407 and *Alternaria solani* PKSF BAE80697. PKS = ketoacyl synthase, AT= acyl transferase, DH = dehydratase, AdoMet = methyltransferase, enoyl red = enoyl reductase, KR = ketoreductase.

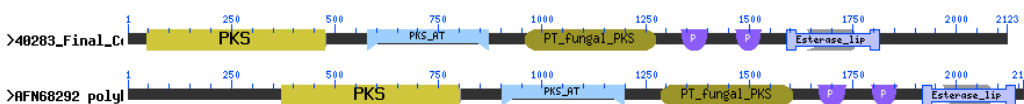

**Figure S12.** Domain order of PKS40283 and PKSA of *Alternaria alternata* AFN68292. PKS = ketoacyl synthase, AT= acyl Table 14. Domain order of PKS3398 and polyketide synthase of *Metarhizium brunneum* KID62944.

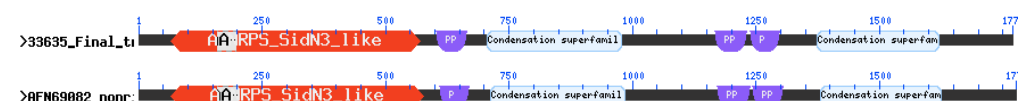

**Figure S13.** Domain order of NRPS33635 and NPS6 of *Alternaria alternata* AFN69082. A=adenylation, Condensation superfamil = condensation, PP = peptidyl carrier protein?

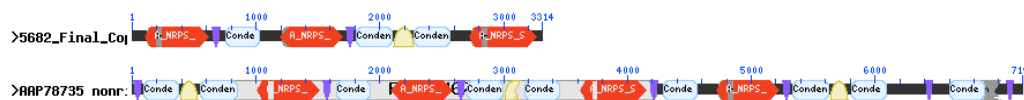

**Figure S14.** Domain order of PKS5682 and *Alternaria brassicae* nrps1 AAP78735.

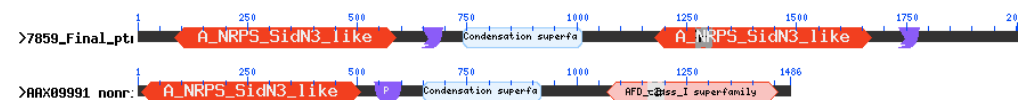

**Figure S15.** Domain order of NRPS7859 and NPS9 of *Cochliobolus heterostrophus* AAX09991. A=adenylation, Condensation superfamil = condensation, P = peptidyl carrier protein?

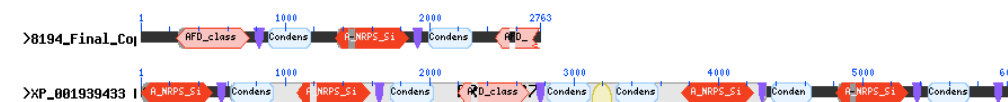

**Figure S16.** Domain order of NRPS8194 and HC-toxin synthetase of *Pyrenophora tritici-repentis*.

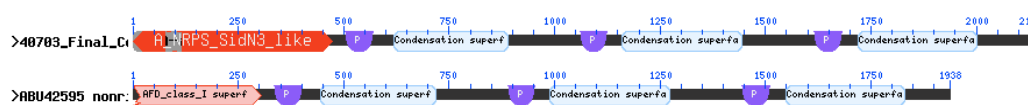

**Figure S17.** Domain order of NRPS40703 and NPS2 of *Alternaria brassicicola*.

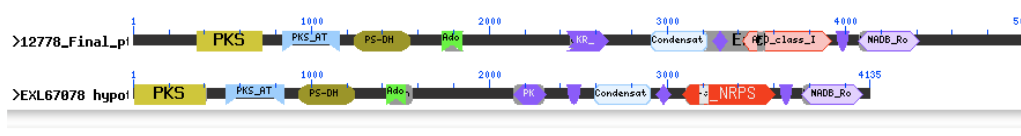

**Figure S18.** Domain order of PKS12778 and hypothetical protein from *Fusarium oxysporum* f. sp. *conglutinans* EXL67078. PKS = ketoacyl synthase, AT= acyl transferase, DH = dehydratase, AdoMet = methyltransferase, KR = ketoreductase, Condensat = condensation, A NRPS = adenylation, NADB Ro = NAD binding Rossman folding.

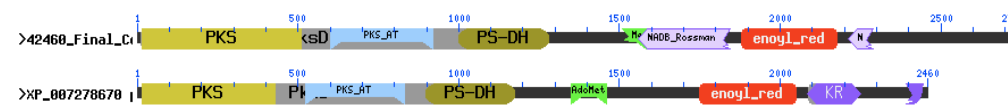

**Figure S19.** Domain order of PKS42460 and hypothetical polyketide synthase of *Colletotrichum gloeosporioides* XP\_007270670. Enoyl red = enoyl reductase .

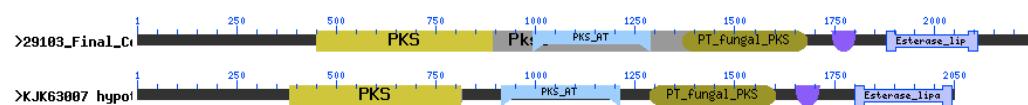

**Figure S20.** Domain order of PKS29103 and hypothetical protein of *Aspergillus parasiticus* KJK63007.

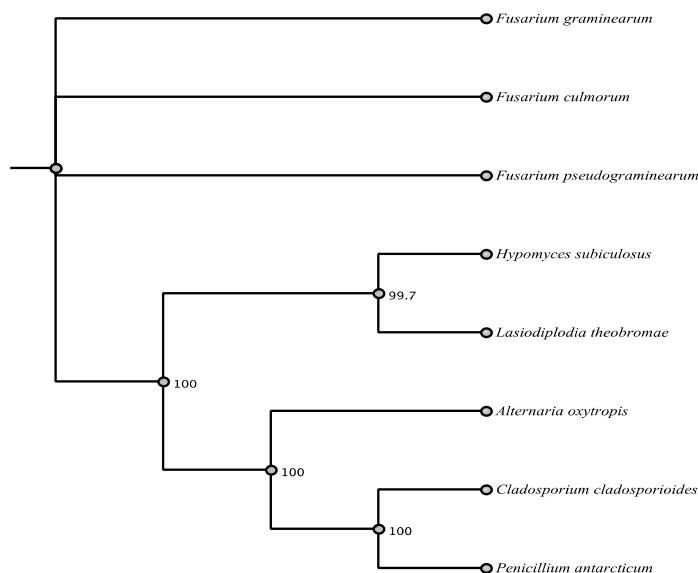

**Figure S21.** Maximum parsimony tree (MUSCLE alignment and 1000 replicates). *Lasiodiplodia theobromae* was used as the outgroup. Fungi in tree are pblast results of 17612 sequence.

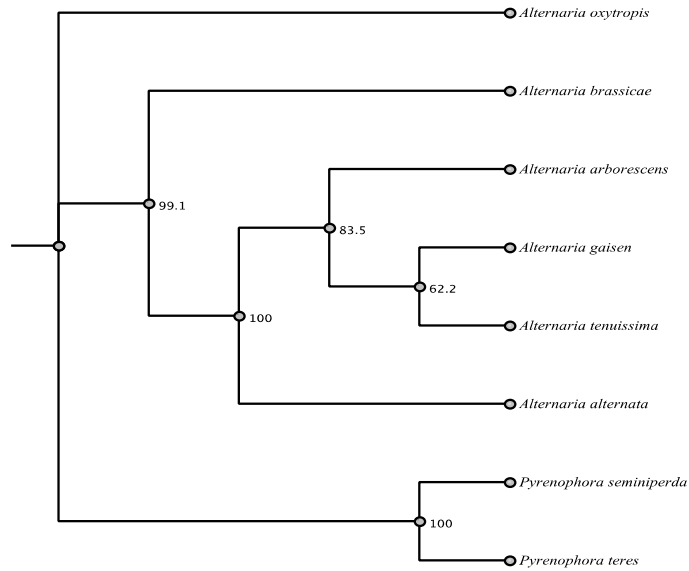

**Figure S22.** Maximum parsimony tree (MUSCLE alignment and 1000 replicates). *Pyrenophora teres* was used as the outgroup. Fungi in tree are pblast results of 5682 sequence.

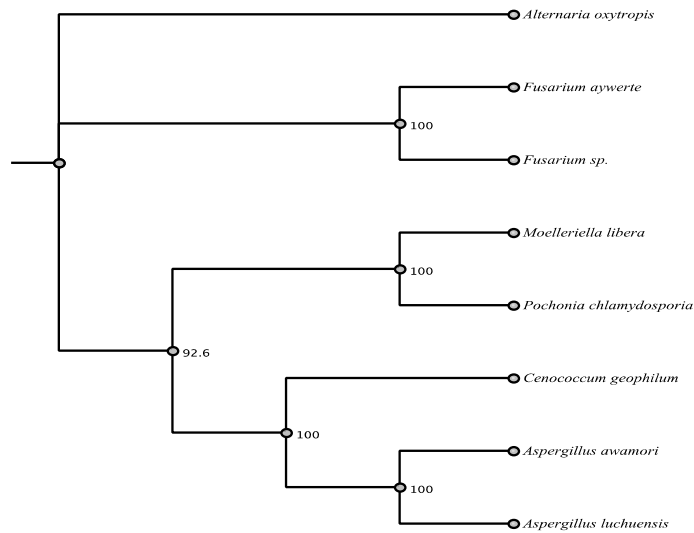

**Figure S23.** Maximum parsimony tree (MUSCLE alignment and 1000 replicates). *Aspergillus luchuensis* was used as the outgroup. Fungi in tree are pblast results of 9132 sequence.

**Table S1.** GenBank accession numbers and amino acid percent identity of blast results of 2122 sequence. .

| Organism                         | Accession      | Amino Acid Percent Identity |
|----------------------------------|----------------|-----------------------------|
| <i>Alternaria alternantherae</i> | AOO87092.1     | 89.59%                      |
| <i>Alternaria tenuissima</i>     | RYN35181.1     | 88.97%                      |
| <i>Alternaria solani</i>         | BAD83684.1     | 90.13%                      |
| <i>Pyrenophora teres</i>         | EFQ86427.1     | 89.01%                      |
| <i>Alternaria alternata</i>      | XP_018381235.1 | 89.08%                      |
| <i>Alternaria arborescens</i>    | RYN41486.1     | 89.13%                      |
| <i>Alternaria gaisen</i>         | RYO51295.1     | 89.09%                      |

**Table S2.** Genbank accession numbers and amino acid percent identity of blast results of 17612 sequence. .

| Organism                       | Accession  | Amino Acid Percent Identity |
|--------------------------------|------------|-----------------------------|
| <i>Penicillium antarcticum</i> | OQD80247.1 | 64.45%                      |

|                                     |                |        |
|-------------------------------------|----------------|--------|
| <i>Cladosporium cladosporioides</i> | A0A0Y0M151.1   | 62.81% |
| <i>Hypomyces subiculosus</i>        | ACD39758.1     | 58.65% |
| <i>Fusarium pseudograminearum</i>   | XP_009258258.1 | 58.00% |
| <i>Fusarium graminearum</i>         | EYB31080.1     | 57.96% |
| <i>Lasiodiplodia theobromae</i>     | AHV78245.1     | 56.92% |
| <i>Fusarium culmorum</i>            | PTD11157.1     | 57.28% |

**Table S3.** Genbank accession numbers and amino acid percent identity of blast results of 8407 sequence. .

| <b>Organism</b>                  | <b>Accession</b> | <b>Amino Acid Percent Identity</b> |
|----------------------------------|------------------|------------------------------------|
| <i>Alternaria solani</i>         | BAE80697.1       | 81.14%                             |
| <i>Alternaria arborescens</i>    | RYO53185.1       | 80.47%                             |
| <i>Alternaria tenuissima</i>     | RYN97731.1       | 80.46%                             |
| <i>Alternaria alternata</i>      | OWY52567.1       | 80.50%                             |
| <i>Alternaria alternantherae</i> | AOO87095.1       | 79.93%                             |
| <i>Pyrenophora seminiperda</i>   | RMZ66475.1       | 69.35%                             |
| <i>Pyrenophora teres</i>         | EFQ92739.1       | 69.54%                             |

**Table S4.** Genbank accession numbers and amino acid percent identity of blast results of 3398 sequence. .

| <b>Organism</b>                 | <b>Accession</b> | <b>Amino Acid Percent Identity</b> |
|---------------------------------|------------------|------------------------------------|
| <i>Lepidopterella palustris</i> | OCK76486.1       | 74.49%                             |
| <i>Metarhizium brunneum</i>     | XP_014539917.1   | 63.54%                             |
| <i>Metarhizium robertsii</i>    | XP_007819463.1   | 64.25%                             |
| <i>Metarhizium guizhouense</i>  | KID81569.1       | 63.31%                             |
| <i>Metarhizium anisopliae</i>   | KJK77000.1       | 64.03%                             |
| <i>Aspergillus fischeri</i>     | XP_001265535.1   | 62.66%                             |
| <i>Aspergillus terreus</i>      | XP_001213896.1   | 63.00%                             |

**Table S5.** GenBank accession numbers and amino acid percent identity of blast results of 40283 sequence. .

| <b>Organism</b>                  | <b>Accession</b> | <b>Amino Acid Percent Identity</b> |
|----------------------------------|------------------|------------------------------------|
| <i>Alternaria tenuissima</i>     | RYN42853.1       | 95.17%                             |
| <i>Alternaria alternata</i>      | AFN68292.1       | 95.21%                             |
| <i>Alternaria arborescens</i>    | RYO71336.1       | 95.26%                             |
| <i>Alternaria gaisen</i>         | RYO46317.1       | 94.47%                             |
| <i>Alternaria alternantherae</i> | AOO87097.1       | 93.54%                             |
| <i>Stemphylium lycopersici</i>   | KNG52671.1       | 90.05%                             |
| <i>Bipolaris sorokiniana</i>     | XP_007696213.1   | 88.93%                             |

**Table S6.** Genbank accession numbers and amino acid percent identity of blast results of 33635 sequence. .

| <b>Organism</b>                | <b>Accession</b> | <b>Amino Acid Percent Identity</b> |
|--------------------------------|------------------|------------------------------------|
| <i>Alternaria alternata</i>    | AFN69082.1       | 91.40%                             |
| <i>Alternaria tenuissima</i>   | RYN35257.1       | 91.46%                             |
| <i>Alternaria arborescens</i>  | XP_028502413.1   | 91.63%                             |
| <i>Alternaria gaisen</i>       | RYO50458.1       | 91.18%                             |
| <i>Stemphylium lycopersici</i> | KNG49863.1       | 85.82%                             |
| <i>Bipolaris oryzae</i>        | XP_007684283.1   | 82.59%                             |
| <i>Exserohilum turcica</i>     | XP_008020405.1   | 82.62%                             |

**Table S7.** Genbank accession numbers and amino acid percent identity of blast results of 5682 sequence. .

| <b>Organism</b>              | <b>Accession</b> | <b>Amino Acid Percent Identity</b> |
|------------------------------|------------------|------------------------------------|
| <i>Alternaria tenuissima</i> | RYN60358.1       | 90.75%                             |

|                                |                |        |
|--------------------------------|----------------|--------|
| <i>Alternaria alternata</i>    | XP_018382376.1 | 90.69% |
| <i>Alternaria arborescens</i>  | RYN26111.1     | 90.51% |
| <i>Alternaria gaisen</i>       | RYO35725.1     | 90.23% |
| <i>Alternaria brassicae</i>    | AAP78735.1     | 89.47% |
| <i>Pyrenophora teres</i>       | EFQ92073.1     | 80.96% |
| <i>Pyrenophora seminiperda</i> | RMZ69649.1     | 79.25% |

**Table S8.** Genbank accession numbers and amino acid percent identity of blast results of 9132 sequence.

| <b>Organism</b>                | <b>Accession</b> | <b>Amino Acid Percent Identity</b> |
|--------------------------------|------------------|------------------------------------|
| <i>Fusarium</i> sp.            | RBR08923.1       | 74.84%                             |
| <i>Fusarium aywerte</i>        | ALQ32761.1       | 72.71%                             |
| <i>Moelleriella libera</i>     | KZZ87545.1       | 69.00%                             |
| <i>Pochonia chlamydosporia</i> | XP_022284243.1   | 67.00%                             |
| <i>Cenococcum geophilum</i>    | OCK93825.1       | 61.71%                             |
| <i>Aspergillus luchuensis</i>  | OJZ90116.1       | 58.53%                             |
| <i>Aspergillus awamori</i>     | GCB20567.1       | 58.30%                             |
